# Supplementary material for: High-efficiency organic solar cells enabled by non-ionic small-molecule cathode interlayers with tunable alkoxy side chains
Source: Royal Society of Chemistry journal article supplement (doi:10.1039/d5tc03837e), 2026-01-01
Supplement: d5tc03837e1.pdf [file d5tc03837e1.pdf]

## High-efficiency organic solar cells enabled by non-ionic small-molecule cathode interlayers with tunable alkoxy side chains †

Zhi-Yong Qiu,<sup>a,b</sup> Yu-Long Peng,<sup>a,b</sup> Peng Liu,<sup>a</sup> Zhe Dong,<sup>a,b</sup> Pachaiyappan Murugan,<sup>d</sup> Kun-Ming Liu,<sup>a</sup> Li-Qing Li,<sup>a</sup> Jinhua Li,<sup>\*a</sup>, Zai-Fang Li,<sup>c\*</sup> and Shi-Yong Liu<sup>\*a,b</sup>

<sup>a</sup>. Jiangxi Provincial Key Laboratory of Functional Crystalline Materials Chemistry, School of Chemistry and Chemical Engineering, Jiangxi University of Science and Technology, Ganzhou 341000, China. E-mail: lijh@jxust.edu.cn

<sup>b</sup>. School of Chemical Engineering, Guangdong University of Petrochemical Technology, Maoming, Guangdong 525000, China. E-mail: chelsy@zju.edu.cn

<sup>c</sup>. China-Australia Institute for Advanced Materials and Manufacturing (IAMM), Jiaying University, Jiaying 314001, China.

<sup>d</sup>. Center for Global Health Research, Saveetha Medical College and Hospital, Saveetha Institute of Medical and Technical Sciences, Kancheepuram District, Tamil Nadu, India.

### Corresponding author:

\* E-mail: [chelsy@zju.edu.cn](mailto:chelsy@zju.edu.cn) (S.-Y. Liu)

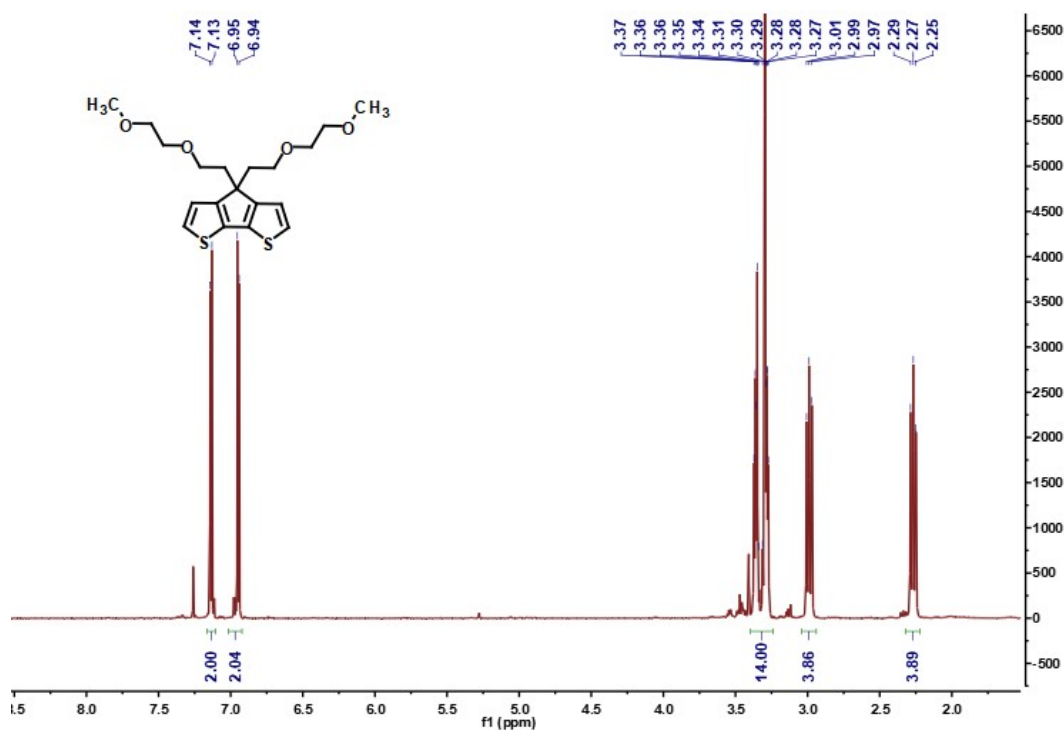**Figure S1.** <sup>1</sup>H NMR of 1a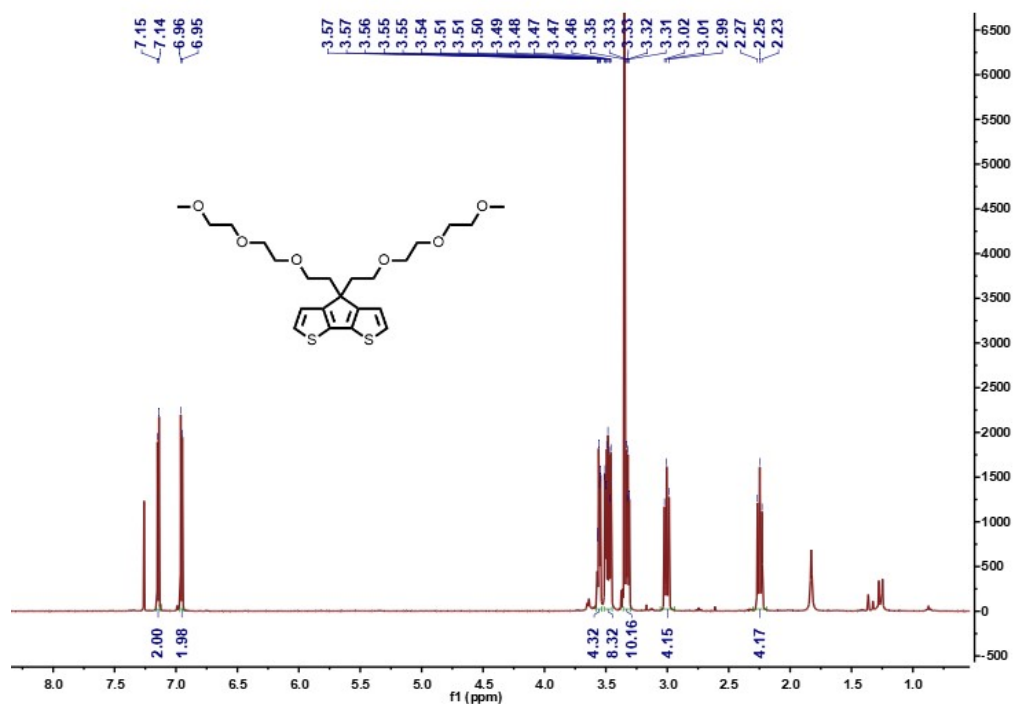**Figure S2.** <sup>1</sup>H NMR of 1b

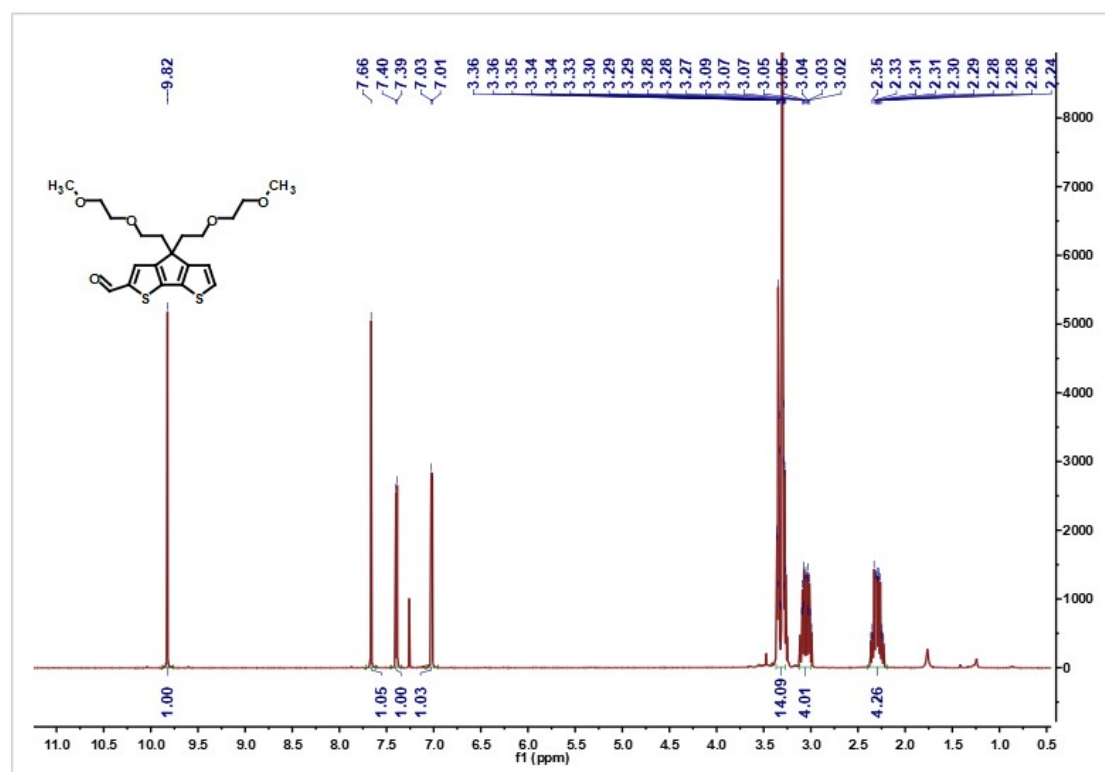**Figure S3.** <sup>1</sup>H NMR of 2a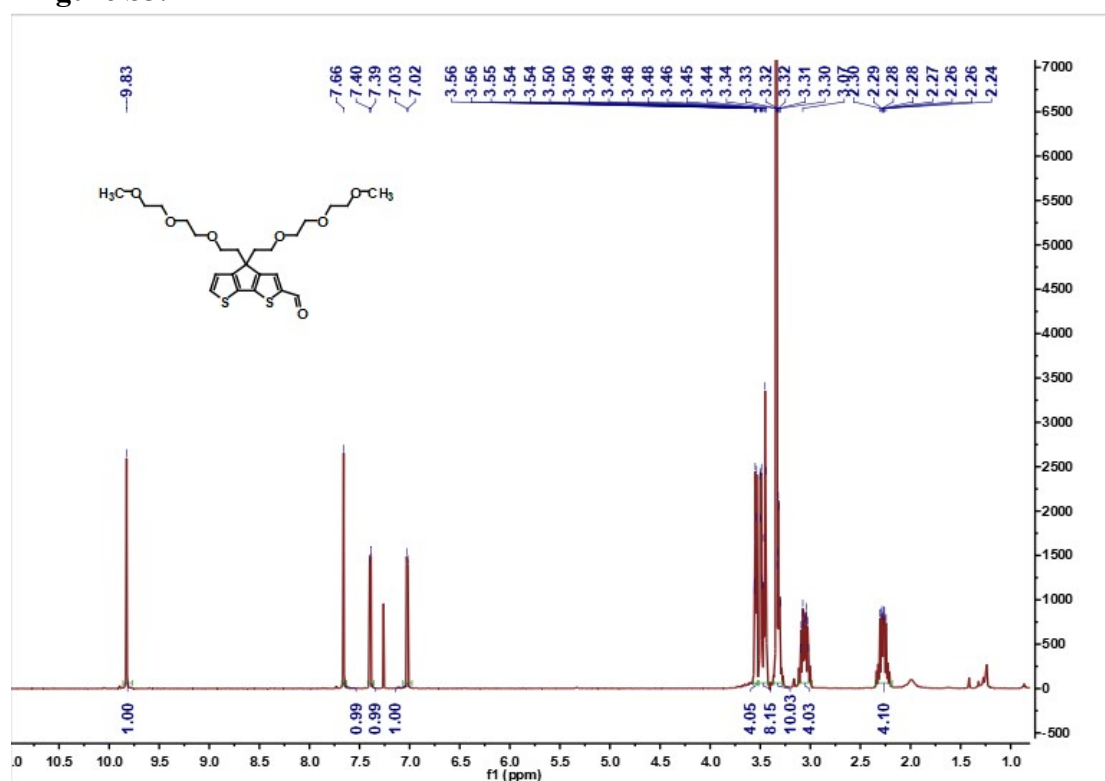**Figure S4.** <sup>1</sup>H NMR of 2b

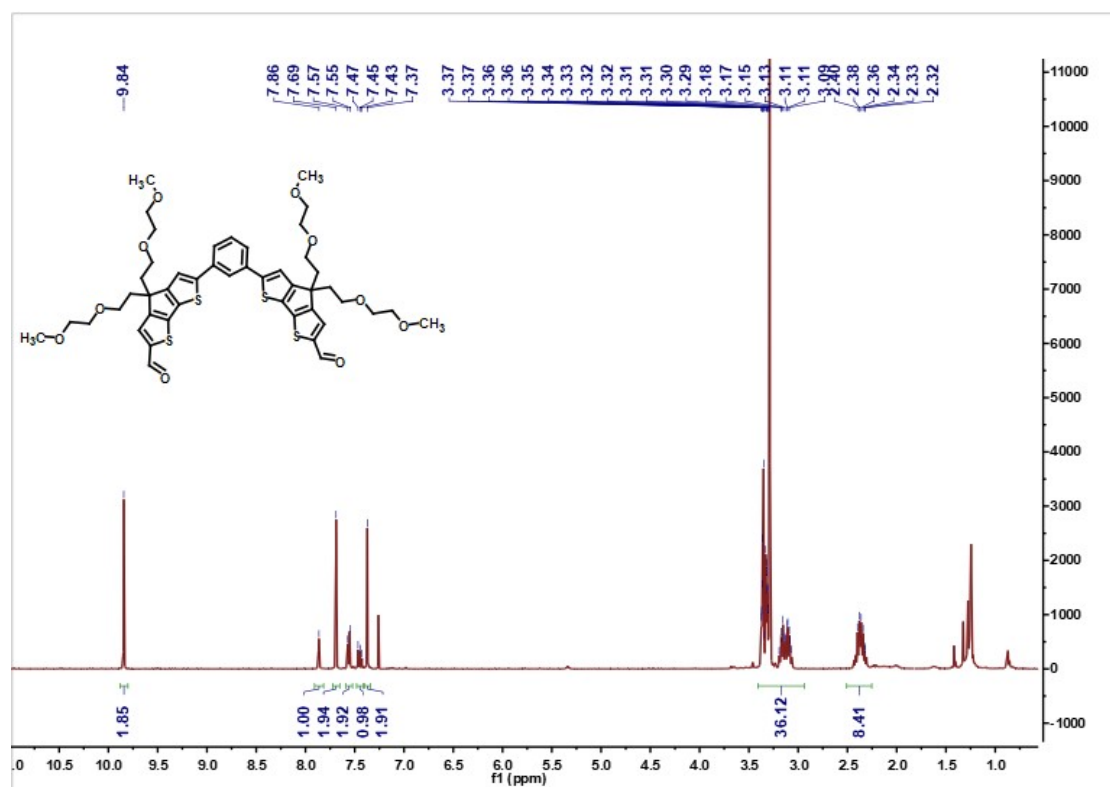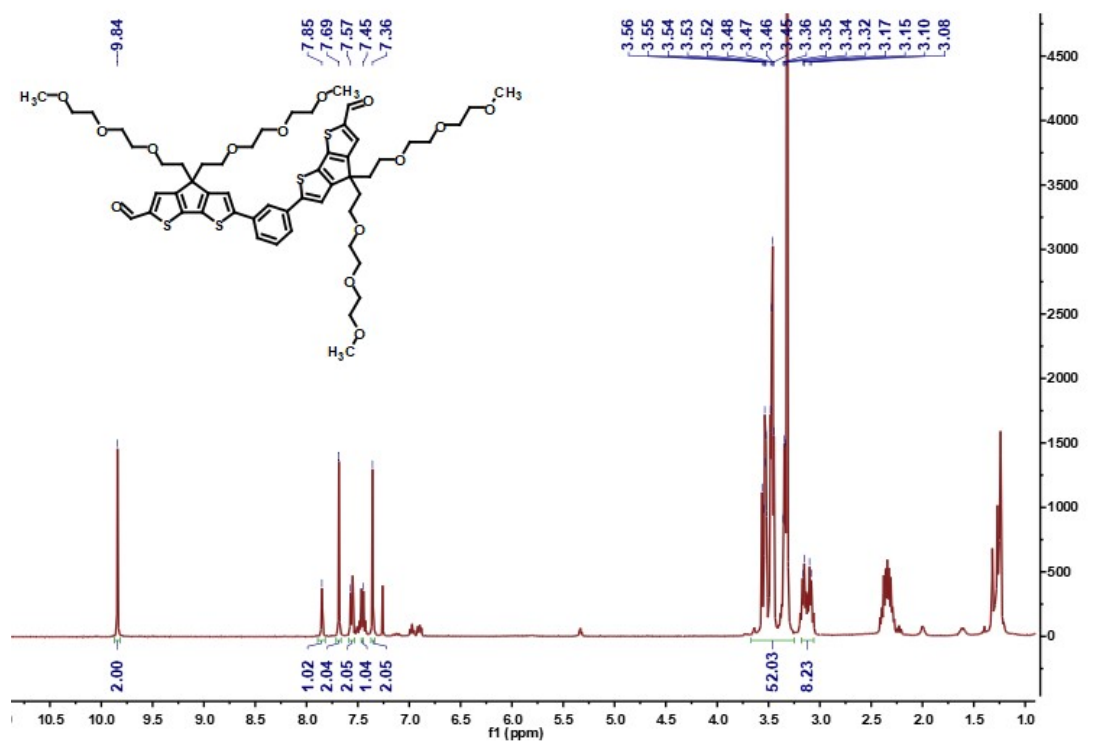

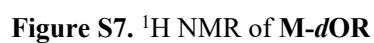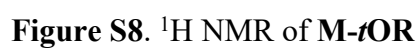

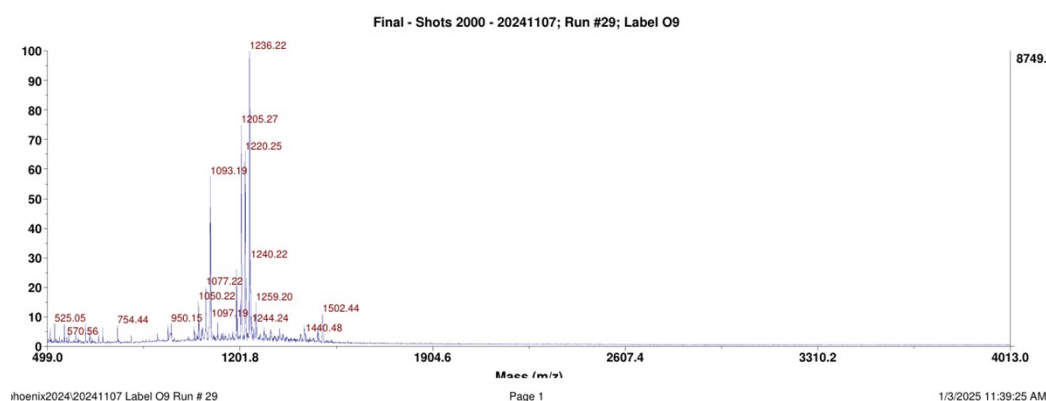**Figure S9.** MLADI-TOF of **M-dOR**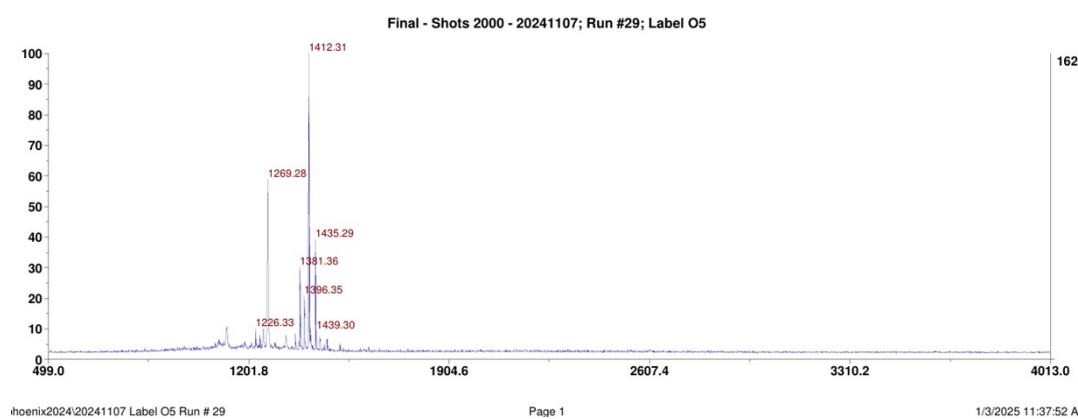**Figure S10.** MLADI-TOF of **M-tOR**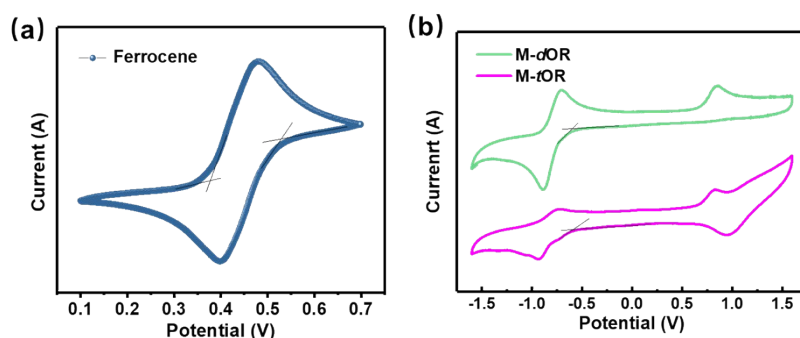**Figure S11.** CV curves of (a) standard, (b) **M-dOR** and **M-tOR**

### Device fabrication

Organic photovoltaics were fabricated on glass substrates pre-coated with a layer of indium tin oxide (ITO) with the structure of ITO/PEDOT:PSS/Active layer/CIL/Ag. Before fabrication, the substrates were subjected to a series of cleaning agents including detergent, deionized water, acetone, and isopropanol, with each step lasting for 20 minutes. Subsequently, the pre-treated ITO substrates were exposed to an ultraviolet ozone generator for a duration of 6 minutes, followed by being spin-coating of PEDOT:PSS (Clevios™ 4083) at 4500 rpm. After baking the PEDOT:PSS layer in air at 135°C for 10 min, the substrates were transferred into the N<sub>2</sub> glovebox to ensure a controlled environment. For all blends, the total concentration was maintained at 16

mg·ml<sup>-1</sup> dissolved in chloroform, with a fixed donor-acceptor (D:A) weight ratio of 1:1.25, 0.5% (v/v) CN as additive and spin-coated in a nitrogen glove box at 3000 rpm for 40 s, and then were annealed at 100°C, 10min. After that, the TFE solution of **M-dOR** (0.25 mg/mL)/**M-rOR** (0.25 mg/mL)/PDINO (1.0 mg/mL) was spin-coated at 3500r/3000r; Finally, thermal evaporation was employed to deposit a 100 nm-thick silver (Ag) electrode, and the testing aperture area was 0.043 cm<sup>2</sup>

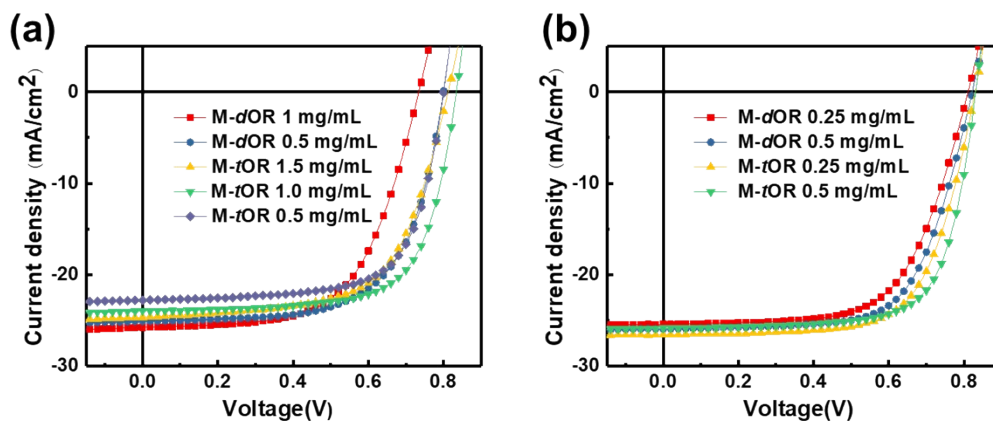

**Figure S12.** (a)  $J$ - $V$  curve (CH<sub>3</sub>OH solvent); (b)  $J$ - $V$  curve (TFE solvent)

**Table S1.** Optimization parameters of CIL with different concentrations using CH<sub>3</sub>OH as solvent

| Spin speed/rpm | CIL          | C (mg/mL) | <sup>a</sup> $V_{oc}$ (V) | <sup>a</sup> $J_{sc}$ (mA/cm <sup>2</sup> ) | <sup>a</sup> FF (%) | <sup>a</sup> PCE (%) |
|----------------|--------------|-----------|---------------------------|---------------------------------------------|---------------------|----------------------|
| 3000           | <b>M-dOR</b> | 1         | 0.73                      | 25.78                                       | 60.37               | 11.42                |
|                |              | 0.5       | 0.80                      | 25.12                                       | 64.54               | 12.96                |
| 3000           | <b>M-rOR</b> | 0.5       | 0.80                      | 22.81                                       | 68.59               | 12.52                |
| 3000           |              | 1         | 0.83                      | 23.99                                       | 69.19               | 13.84                |
| 3000           |              | 1.5       | 0.81                      | 24.67                                       | 62.84               | 12.59                |

**Table S2.** Optimization parameters of CIL with different concentrations using TFE as solvent

| Spin speed/rpm | CIL          | C (mg/mL) | <sup>a</sup> $V_{oc}$ (V) | <sup>a</sup> $J_{sc}$ (mA/cm <sup>2</sup> ) | <sup>a</sup> FF (%) | <sup>a</sup> PCE (%) |
|----------------|--------------|-----------|---------------------------|---------------------------------------------|---------------------|----------------------|
| 3000           | <b>M-dOR</b> | 0.25      | 0.82                      | 25.94                                       | 66.05               | 14.09                |
| 3000           |              | 0.5       | 0.81                      | 25.4                                        | 63.30               | 13.07                |
| 3000           | <b>M-rOR</b> | 0.25      | 0.83                      | 25.88                                       | 71.42               | 15.36                |

|      |     |      |       |       |       |
|------|-----|------|-------|-------|-------|
| 3000 | 0.5 | 0.83 | 25.89 | 66.06 | 14.12 |
|------|-----|------|-------|-------|-------|

**Table S3. Summary table of properties of several reported multi-arm CIL molecules based on different active layers**

| CIL                 | Active layer   | $V_{oc}$ (V) | $J_{sc}$ (mA/cm <sup>2</sup> ) | FF (%) | PCE (%) | Publish Date | Reference |
|---------------------|----------------|--------------|--------------------------------|--------|---------|--------------|-----------|
| <b>OBN-Ph-N</b>     | PM6:L8-BO      | 0.87         | 26.65                          | 73.60  | 17.06   | 2025.8.25    | 1         |
| <b>NTN</b>          | PM6:BTP-eC9    | 0.862        | 27.6                           | 73.3   | 17.4    | 2025.2.26    | 2         |
| <b>NTRIC</b>        | PM6:BTP-eC9    | 0.825        | 28.3                           | 73.3   | 17.1    |              | 2         |
| <b>BT-N-M</b>       | PM6:Y6         | 0.859        | 26.37                          | 75.43  | 17.09   | 2025.8.17    | 2         |
| <b>3ONIN</b>        | PM6:BTP-eC9    | 0.827        | 27.58                          | 73.74  | 16.73   | 2024.2.1     | 2, 3      |
| <b>NTA</b>          | PM6:Y6         | 0.849        | 26.72                          | 74.3   | 16.86   | 2022.8.1     | 4         |
| <b>HPDIN-B01</b>    | PM6:BTP-BO-4Cl | 0.848        | 26.65                          | 76.77  | 17.40   | 2023.11.1    | 5         |
| <b>N-TBHOB</b>      | PM6:Y6         | 0.843        | 26.33                          | 75.64  | 16.78   | 2022.4.25    | 6         |
| <b>M-<i>r</i>OR</b> | PM6:Y6         | 0.83         | 25.88                          | 71.4   | 15.36   | 15.36        | This Work |

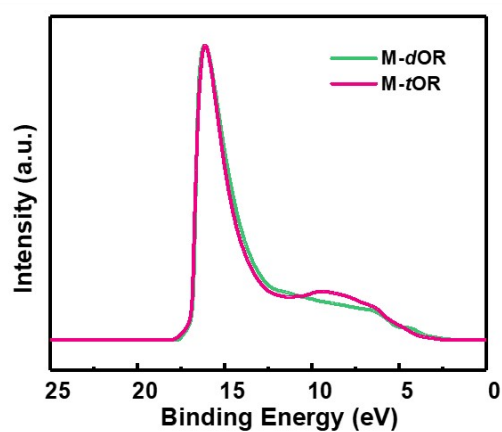**Figure S13. UPS spectra of M-*d*OR; and M-*r*OR.**

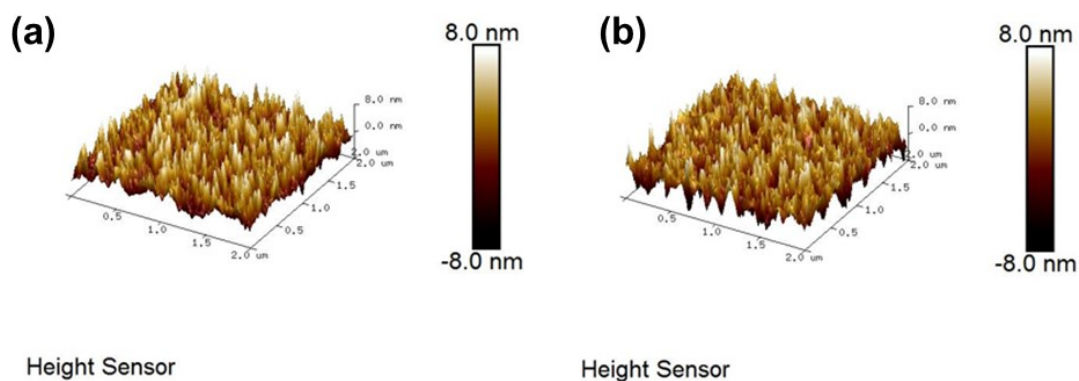

**Figure S14.** AFM 3D height image of **M-dOR**; and (b)**M-tOR**.

**Reference:**

1. J. Jian, J. Zhao, Y. Liang, K. Xue, G.-G. Luo, X. Zheng, Z. Liu, W. Chen, Q. Zhao, S. Chen, D. Chen and J. Huang, *Adv. Funct. Mater.*, 2025, **35**, 2500751.
2. S. Dai, J. Jiang, L. Yu, L. Cui, X. Zhang, C. Zhang, K. Gao, H. Jiang and M. Huang, *J. Mater. Chem. A*, 2025, **13**, 10088-10096.
3. W. Liu, J. Wen, H. Yu, X. Zhan, Y. Wang, L. Zhang, Y. Fan, Z. You and Y. Liu, *Angew. Chem. Int. Ed.*, 2025, **64**, e202413135.
4. Y. Zhao, X. Liu, X. Jing, S. Liu, H. Liu, Y. Liu, L. Yu, S. Dai and M. Sun, *Chem. Eng. J.*, 2022, **441**, 135894.
5. D. Xia, X. Chen, J. Fang, Q. Xie, X. Jiang, Y. Zhang, C. Li, Z. Hu, L. Wan, S. You, W. Li and C. Zhao, *Macromolecules*, 2023, **56**, 9097-9106.
6. L. Wang, Y. Chen, W. Tao, K. Wang, Z. Peng, X. Zheng, C. Xiang, J. Zhang, M. Huang and B. Zhao, *Macromol. Rapid Commun.*, 2022, **43**, 2200119.
